# Supplementary material for: Association between Prior Malignancy Exclusion Criteria and Age Disparities in Cancer Clinical Trials
Source: MDPI journal article supplement (doi:10.3390/cancers14041048), 2022-02-18
Supplement: s1 [file s1]

| <b>Supplemental Table S1. Factors Associated with Age Disparities – PMEC10.</b> |                  |                  |                      |                      |                                  |
|---------------------------------------------------------------------------------|------------------|------------------|----------------------|----------------------|----------------------------------|
| Trial/Author Characteristics                                                    |                  | Number of trials | Mean DMA (SE), years | Univariable p-value* | Multivariable regression p-value |
| All                                                                             |                  | 723              | -5.82 (0.23)         | -                    | -                                |
| PMEC-10                                                                         | Yes              | 67               | -8.52 (0.84)         | <b>&lt;0.001</b>     | <b>&lt;0.001</b>                 |
|                                                                                 | No               | 656              | -5.54 (0.24)         | -                    |                                  |
| Industry funding of trial                                                       | Yes              | 585              | -5.87 (0.26)         | 0.25                 | -                                |
|                                                                                 | No               | 138              | -5.58 (0.53)         | -                    | -                                |
| Cooperative Group Trial                                                         | Yes              | 182              | -5.97 (0.46)         | 0.92                 | -                                |
|                                                                                 | No               | 541              | -5.77 (0.27)         | -                    | -                                |
| Enrollment Start Year                                                           | 1991-2000        | 30               | -4.19 (0.97)         | 0.64                 | -                                |
|                                                                                 | 2001-2005        | 133              | -6.62 (0.52)         | -                    | -                                |
|                                                                                 | 2006-2010        | 315              | -5.70 (0.37)         | -                    | -                                |
|                                                                                 | 2011-2015        | 191              | -5.79 (0.45)         | -                    | -                                |
|                                                                                 | 2016-2020        | 54               | -5.57 (0.75)         | -                    | -                                |
| Disease Site <sup>†</sup>                                                       | Breast           | 142              | -7.05 (0.46)         | <b>0.012</b>         | 0.56                             |
|                                                                                 | Gastrointestinal | 97               | -7.97 (0.45)         | <b>&lt;0.001</b>     | <b>0.043</b>                     |
|                                                                                 | Genitourinary    | 98               | -0.45 (0.57)         | <b>&lt;0.001</b>     | <b>&lt;0.001</b>                 |
|                                                                                 | Head & Neck      | 30               | -2.46 (1.06)         | <b>0.003</b>         | <b>&lt;0.001</b>                 |
|                                                                                 | Skin             | 29               | -5.74 (0.82)         | 0.97                 | -                                |
|                                                                                 | Thoracic         | 126              | -9.05 (0.32)         | <b>&lt;0.001</b>     | <b>&lt;0.001</b>                 |
|                                                                                 | Hematologic      | 144              | -6.62 (0.59)         | 0.57                 | -                                |
|                                                                                 | Other            | 57               | -0.98 (0.86)         | <b>&lt;0.001</b>     | <b>&lt;0.001</b>                 |
| Treatment modality <sup>§</sup>                                                 | Systemic therapy | 624              | -5.97 (0.25)         | <b>0.028</b>         | 0.72                             |
|                                                                                 | Radiotherapy     | 15               | -2.92 (1.03)         | <b>0.029</b>         | 0.28                             |
|                                                                                 | Surgery          | 5                | -10.44 (4.48)        | 0.45                 | -                                |
|                                                                                 | Supportive Care  | 79               | -4.92 (0.68)         | 0.11                 | -                                |
| Targeted Therapy                                                                | Yes              | 454              | -6.18 (0.29)         | <b>0.019</b>         | 0.32                             |
|                                                                                 | No               | 269              | -5.19 (0.39)         | -                    | -                                |
| Completed planned accrual <sup>#</sup>                                          | Yes              | 417              | -5.48 (0.31)         | 0.08                 | -                                |
|                                                                                 | No               | 154              | -6.61 (0.52)         | -                    | -                                |
| Trial success (PEP met) <sup>^</sup>                                            | Yes              | 344              | -5.63 (0.36)         | 0.65                 | -                                |
|                                                                                 | No               | 299              | -5.90 (0.34)         | -                    | -                                |

Abbreviations: PMEC-10, prior malignancy exclusion criteria for prior cancers within 10 years/indefinitely.

\*P-value reflects Mann-Whitney *U*-test, except for Disease Site and Treatment Modality (for which the Kruskal-Wallis test was used) and Enrollment Start Year (for which a linear regression was conducted).

‡Limited to trials with a defined single disease site. “Other” includes trials of other single disease sites. Trials with multiple disease sites were excluded.

§Primary intervention as part of the randomization. Systemic therapy includes cytotoxic chemotherapy, targeted systemic agents, and similar, with primary endpoint aimed at improved disease-related outcomes. Supportive care trials aimed to reduce disease- or treatment-related toxicity.

#152 trials did not have final accrual data, in some cases due to trial ongoing.

^100 trials either had multiple PEPs with mixed results or did not have any associated publication
